# Supplementary material
Source: publisher figshare collection journal article supplement (https://acs.figshare.com/ndownloader/files/5132785)
Supplement: Supplementary file 1 [file 5132785]

# SUPPLEMENTARY MATERIAL

## Ordering the Reductive and Cytochrome P450 Oxidative Steps in Demethylsterigmatocystin Formation Yields General Insights into the Biosynthesis of Aflatoxin and Related Fungal Metabolites

Kevin M. Henry and Craig A. Townsend\*

Department of Chemistry, The Johns Hopkins University,

Charles and 34<sup>th</sup> Streets, Baltimore, MD 21218

### Experimental Section

**General Materials and Methods:** Melting points were determined with a Thomas-Hoover oil bath apparatus in open capillaries and are uncorrected.  $^1\text{H}$  and  $^{13}\text{C}$  NMR spectra were recorded on a Varian Unity<sup>Plus</sup> 400 MHz spectrometer and are referenced to  $\text{CDCl}_3$  (7.27 and 77.0 ppm) or  $d_6$ -acetone (2.04 and 29.9 ppm) as indicated. High and low resolution mass spectra were recorded by Dr. Joseph Kachinski of the Department of Chemistry, The Johns Hopkins University using a VG Instruments 70-S 250 GC/MS at 70 eV in  $\text{EI}^+$ ,  $\text{CI}^+$ , or FAB operating modes. Additional exact mass determinations were performed by Dr. Christopher Hadad of the Ohio State University and by Dr. Ronald Cerny of the University of Nebraska. Infrared spectra were recorded on a Perkin-Elmer 1600 Series FTIR spectrophotometer. Combustion analyses were performed by Atlantic Microlab, Inc. (Norcross, GA). Flash chromatography was

performed using EM silica gel 60 (230-400 mesh). Thin-layer chromatography (TLC) was performed on Analtech Uniplate glass plates containing fluorescent indicator. TLC plates were photographed by James Van Rensselaer, The Johns Hopkins University. Reagents and aflatoxin standards were purchased from Aldrich, Inc. Media components were purchased from Difco (Detroit, MI) or Fisher (Pittsburg, PA). Nonaqueous reactions were performed in flame-dried glassware under an atmosphere of N<sub>2</sub> or Ar. Solvents were distilled immediately prior to use (THF and Et<sub>2</sub>O from sodium/benzophenone ketyl, and CH<sub>2</sub>Cl<sub>2</sub> and CH<sub>3</sub>CN from CaH<sub>2</sub>). During workup organic solutions were dried over anhydrous Na<sub>2</sub>SO<sub>4</sub>. HPLC was performed with a Perkin-Elmer 235C diode array detector and Series 410 LC pump using a Phenomenex (Torrance, CA) reverse-phase column (Prodigy 5 $\mu$  ODS(3) 100Å, 250 x 4.60 mm, 5 micron). Mini-prep columns were purchased from Qiagen (Valencia, CA).

## SYNTHETIC PROCEDURES

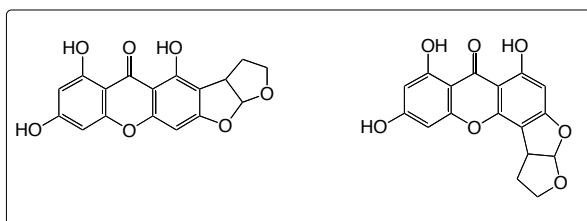

Synthesis of (*Linear*) 4,6,8-Trihydroxy-2,3,3a,12a-tetrahydrofuro[2,3-b]furo-xanth-5-one (**24**) and (*Angular*) 4,6,8-Trihydroxy-1,2,3a,12c-tetrahydrofuro[2,3-c]furo-xanth-7-one (**25**).

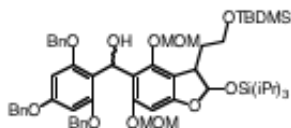

**5-[1-(*R,S*)-{2',4',6'-Tris-(*O*-benzyl)}-1-hydroxy-methyl]-3-(*t*-butyldimethylsilyloxy-2-ethyl)-4,6-bis-(*O*-methoxymethyl)-2,3-dihydro-benzofuran-2-yloxy]-triisopropyl-silane (**13**). (*Procedure A*) A pentane (50 mL) solution of bromide **9** (1.86 g, 2.88 mmol) was cooled to  $-40\text{ }^{\circ}\text{C}$  under argon. *n*-BuLi (1.26 M, 2.29 mL, 2.88 mmol) was added over 30 s. After 1 min a THF (15 mL) solution of 2,4,6-*tris*(*O*-benzyl)-benzaldehyde (**11**, 1.22 g, 2.88 mmol,  $-40\text{ }^{\circ}\text{C}$ ) was cannulated into the pentane solution. The resulting mixture was stirred 15 min at  $-40\text{ }^{\circ}\text{C}$  and then 15 min at  $0\text{ }^{\circ}\text{C}$  before it was quenched with aq  $\text{NaHCO}_3$ . The product mixture was diluted with  $\text{Et}_2\text{O}$  and washed with water and brine, then concentrated and passed through a column of silica gel with 10%  $\text{EtOAc}$  in hexanes. The benzophenolic pair **13** was isolated together as a faintly yellow oil (1.7 g, 59%). TLC  $R_f$  0.55, 0.59 (20%  $\text{EtOAc}$  in hexanes).  $^1\text{H}$  NMR (400 MHz,  $\text{CD}_3\text{COCD}_3$ )  $\delta$  7.4 (m, 15H), 6.62 (t, 1H,  $J = 10.5\text{ Hz}$ ), 6.44 (m, 2H), 5.93, 5.91 (s, 1H), 5.40, 5.32 (d, 1H,  $J = 10.4\text{ Hz}$ ), 5.0 (m, 10H), 3.7 (m, 2H) 3.5 (m, 1H), 3.47, 3.40 (s, 3H), 3.02, 3.00 (s, 3H), 2.87 (s, 1H), 1.95 (m, 1H), 1.51 (m, 1H), 1.12 (m, 21H), 0.92 (m, 9H), 0.07 (m, 6H).  $^{13}\text{C}$  NMR (100 MHz,  $\text{CD}_3\text{COCD}_3$ )  $\delta$  160.7, 160.6, 160.2, 160.0, 159.8, 159.1, 158.4, 157.8, 155.8, 154.7, 154.6, 138.9, 138.7, 130.0, 129.8, 129.2, 129.0, 128.8, 121.2, 120.0, 116.2, 115.6, 115.4, 114.8, 112.1, 107.8, 107.2, 106.9, 100.5, 100.2, 97.5, 96.0, 95.6, 95.4, 95.0, 94.9, 94.5, 93.8, 71.9, 71.7, 71.5, 71.2, 71.0, 68.4, 66.0, 62.3, 62.2, 62.1, 58.1, 57.0, 56.7, 56.4, 56.3, 49.9, 49.8, 48.5, 35.9, 27.0, 19.5, 19.0, 18.9, 13.7, 13.5,  $-4.5$ . IR (neat) 3544 (br), 2947, 2894, 1603, 1498, 1151,**

1112, 1054  $\text{cm}^{-1}$ . HRMS-EI ( $m/z$ ):  $\text{M}^+\text{Na}$  calcd for  $\text{C}_{57}\text{H}_{78}\text{O}_{11}\text{Si}_2$ , 1017.4975; found, 1017.4975. Anal. Calcd for  $\text{C}_{57}\text{H}_{78}\text{O}_{11}\text{Si}_2$ : C, 68.78; H, 7.90. Found: C, 68.72; H, 7.99.

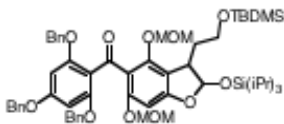

**5-Keto-[2',4',6'-tris-(*O*-benzyl)-phenyl]-3-(*t*-butyldimethyl-silyloxy-2-ethyl)-4,6-bis-(*O*-methoxymethyl)-2,3-dihydro-benzofuran-2-yloxy]-triisopropyl-silane (**15**).**

(*Procedure B*) Benzophenols **13** (1.65 g, 1.66 mmol) were dissolved in  $\text{CH}_2\text{Cl}_2$  (50 mL) and cooled to 0 °C. Dess-Martin periodinane (0.77 g, 1.83 mmol) was added and the mixture was stirred 1 h and warmed to ambient temperature. The mixture was washed with aq  $\text{NaHCO}_3$ , water, and brine, then concentrated and passed through a column of silica gel with 10% EtOAc in hexanes. Benzophenone **15** was isolated as a yellow oil (1.0 g, 60%). TLC  $R_f$  0.55 (20% EtOAc in hexanes).  $^1\text{H}$  NMR (400 MHz,  $\text{CD}_3\text{COCD}_3$ )  $\delta$  7.35 (m, 15H), 6.42 (s, 2H), 6.38 (s, 1H), 6.01 (s, 1H), 5.11 (s, 2H), 5.04 (s, 4H), 4.80 (m, 4H), 3.74 (m, 2H), 3.51 (dd, 1H,  $J = 3.5, 9.6$  Hz.) 3.27 (s, 3H), 3.04 (s, 3H), 1.98 (m, 1H), 1.53 (m, 1H), 1.14 (m, 21H), 0.90, 0.89 (s, 9H), 0.03, 0.02 (s, 6H).  $^{13}\text{C}$  NMR (100 MHz,  $\text{CD}_3\text{COCD}_3$ )  $\delta$  190.77, 163.0, 162.1, 161.7, 161.3, 159.7, 159.4, 158.6, 154.4, 138.1, 138.0, 137.8, 129.5, 129.4, 129.3, 129.2, 129.1, 128.9, 128.8, 128.7, 128.6, 128.4, 128.2, 128.2, 121.3, 117.5, 115.6, 107.2, 107.1, 100.1, 95.5, 94.3, 94.2, 71.5, 71.0, 70.7, 61.6, 57.2, 56.0, 48.8, 35.3, 26.4, 18.9, 18.4, 18.3, 12.9, -5.2. IR (neat) 2947, 2866, 1660, 1600, 1153, 1115, 1047  $\text{cm}^{-1}$ . HRMS-EI ( $m/z$ ):  $\text{M}^+\text{Na}$  calcd for  $\text{C}_{57}\text{H}_{76}\text{O}_{11}\text{Si}_2$ , 1015.4818; found, 1015.4857. Anal. Calcd for  $\text{C}_{57}\text{H}_{76}\text{O}_{11}\text{Si}_2$ : C, 68.92; H, 7.71. Found: C, 68.89; H, 7.96.

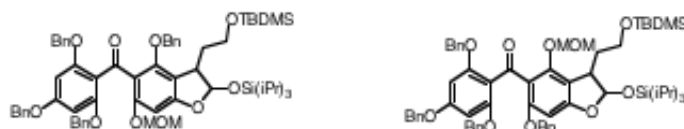

**5-Keto-[2',4',6'-tris-(*O*-benzyl)-phenyl]-3-(*t*-butyldimethyl-silyloxy-2-ethyl)-4-(*O*-benzyl)-6-(*O*-methoxymethyl)-2,3-dihydro-benzofuran-2-yloxy]-triisopropyl-silane and 5-Keto-[2',4',6'-tris-(*O*-benzyl)-phenyl]-3-(*t*-butyldimethyl-silyloxy-2-ethyl)-6-(*O*-benzyl) 4-(*O*-methoxymethyl)-2,3-dihydro-benzofuran-2-yloxy]-triisopropyl-silane.**

(*Procedure C*) Benzophenone **15** (1.0 g, 1.0 mmol) in CH<sub>2</sub>Cl<sub>2</sub> (50 mL) was cooled to 0 °C under argon. BCl<sub>3</sub> (2M in CH<sub>2</sub>Cl<sub>2</sub>, 0.55 mL, 1.1 mmol) was added over several minutes and the ice bath was removed. After 20 min the reaction was quenched with aq NaHCO<sub>3</sub>. The organic layer was separated and washed with water and brine, then dried, concentrated, and passed through a column of silica gel with 20% EtOAc in hexanes. The resulting mixture of monophenols was isolated as a clear oil. TLC R<sub>f</sub> 0.37 (10% EtOAc in hexanes). The mixture was treated with benzyl bromide (2 mL, 16.7 mmol) and DMF (5 mL) and then cooled to 0 °C. NaH (60% suspension, 1.0 g) was added and the ice bath was removed. The mixture was quenched 30 min later with aq NaHCO<sub>3</sub> then diluted with ethyl acetate and water. The organic layer was washed with water and brine, then dried, concentrated and passed through a column of silica gel with 10-30% EtOAc in hexanes. The regioisomeric mixture of tetrabenzyl ethers (0.77 g, 80% over two steps) was isolated as a clear oil. TLC R<sub>f</sub> 0.24 (10% EtOAc in hexanes). <sup>1</sup>H NMR (400 MHz, CD<sub>3</sub>COCD<sub>3</sub>) δ 7.26 (m, 20H), 6.42 (s, 1H), 6.35 (s, 2H), 6.04 (d, 1H, *J* = 1.2 Hz), 5.11 (s, 2H), 4.98, 4.88 (d, 4H, *J* = 6.1 Hz), 4.81 (m, 4H), 3.68 (m, 2H), 3.52 (dd, 1H, *J* = 3.6, 9.6 Hz), 3.13 (s, 3H), 1.98 (m, 1H), 1.64 (m, 1H), 1.18 (m, 21H), 0.83, 0.82 (s, 9H), 0.00, -0.02 (s, 6H). <sup>13</sup>C NMR (100 MHz, CD<sub>3</sub>COCD<sub>3</sub>) δ 190.5, 162.1, 161.9, 159.5, 158.6, 155.9, 138.7, 138.1, 129.4, 129.2, 128.8, 128.8, 128.6, 128.3,

121.7, 117.4, 114.8, 107.5, 107.4, 95.5, 94.3, 94.2, 74.9, 70.8, 70.7, 61.3, 56.0, 48.7, 35.2, 26.4, 18.4, 12.9, -5.2. IR (neat) 2952, 1660, 1602, 1153, 1113  $\text{cm}^{-1}$ . HRMS-EI ( $m/z$ ):  $\text{M}^+\text{Na}$  calcd for  $\text{C}_{62}\text{H}_{78}\text{O}_{10}\text{Si}_2$ , 1061.5026; found, 1061.4941. Anal. Calcd for  $\text{C}_{62}\text{H}_{78}\text{O}_{10}\text{Si}_2$ : C, 71.64; H, 7.56. Found: C, 71.66; H, 7.38.

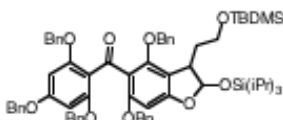

**5-Keto-[2',4',6'-tris-(*O*-benzyl)-phenyl]-3-(*t*-butyldimethyl-silyloxy-2-ethyl)-4,6-bis-(*O*-benzyl)-2,3-dihydro-benzofuran-2-yloxy]-triisopropyl-silane (**17**).**

Pentabenzylether **17** (clear oil, 0.55 g, 0.51 mmol, 75%, TLC  $R_f$  0.28 - 10% EtOAc in hexanes) was prepared from mixture of tetrabenzylethers prepared above (0.7 g, 0.67 mmol) according to *Procedure C*.  $^1\text{H}$  NMR (400M Hz,  $\text{CD}_3\text{COCD}_3$ )  $\delta$  7.32 (m, 25H), 6.41 (s, 1H), 6.29 (s, 2H), 6.05 (d, 1H,  $J = 1.2$  Hz), 5.11 (s, 2H), 4.83 (s, 6H), 4.80, 4.60 (d, 2H,  $J = 12.0$  Hz), 3.70 (m, 2H), 3.51 (dd, 1H,  $J = 2.4, 9.3$  Hz), 2.01 (m, 1H), 1.64 (m, 1H), 1.20 (m, 21H), 0.85 (s, 9H), 0.00, -0.02 (s, 6H).  $^{13}\text{C}$  NMR (100 MHz,  $\text{CD}_3\text{COCD}_3$ )  $\delta$  190.5, 185.1, 162.1, 162.0, 160.2, 159.5, 156.2, 138.8, 138.1, 137.8, 129.4, 129.1, 129.0, 128.8, 128.6, 128.4, 128.3, 128.3, 128.2, 121.1, 117.5, 113.9, 107.4, 94.1, 92.2, 74.9, 71.2, 70.8, 70.7, 61.3, 48.7, 35.2, 26.4, 18.8, 18.4, 18.3, 12.9, -5.2. IR (neat) 2955, 1660, 1602, 1153, 1113  $\text{cm}^{-1}$ . HRMS-EI ( $m/z$ ):  $\text{M}^+\text{Na}$  calcd for  $\text{C}_{67}\text{H}_{80}\text{O}_9\text{Si}_2$ , 1107.5233; found, 1107.5215. Anal. Calcd for  $\text{C}_{67}\text{H}_{80}\text{O}_9\text{Si}_2$ : C, 74.13; H, 7.43. Found: C, 74.39; H, 7.51.

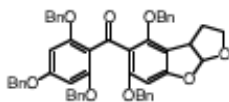

**5-Keto-[2',4',6'-tris-(*O*-benzyl)-phenyl]-4,6-bis-(*O*-benzyl)-[2,3-b]-benzo-2,3,3a,8a-tetrahydro-bisfuran (**19**). (*Procedure D*) To pentabenzylether **17** (0.5 g, 0.46 mmol) and THF (10 mL) was added TBAF (1 M in THF, 1.4 mL, 1.4 mmol). The mixture was heated to reflux (*ca.* 1 h) until conversion to the diol was complete (TLC  $R_f$  0.05 - 20% EtOAc in hexanes). The reaction mixture was then cooled to 0 °C and aq HCl (3.0 M, 2 mL) was added. The ice bath was removed and the mixture was stirred 30 min, then diluted with Et<sub>2</sub>O and quenched with aq NaHCO<sub>3</sub>. The etherial layer was washed with water and brine, then dried, concentrated, and passed through a column of silica gel with 20% EtOAc in hexanes. Tetrahydrobisfuran **19** was isolated (0.31 g, 85% yield, mp = 58-60 °C) as a white solid. TLC  $R_f$  = 0.30 (20% EtOAc in hexanes). <sup>1</sup>H NMR (400 MHz, CD<sub>3</sub>COCD<sub>3</sub>) δ 7.31 (m, 25H), 6.34 (s, 2H), 6.33 (s, 1H), 6.31 (s, 1H), 5.14 (s, 2H), 4.84 (s, 6H), 4.78, 4.60 (d, 2H,  $J$  = 11.4 Hz), 3.96 (m, 2H), 3.42 (q, 1H,  $J$  = 8.4 Hz), 2.05 (m, 1H), 2.00 (m, 1H). <sup>13</sup>C NMR (100 MHz, CD<sub>3</sub>COCD<sub>3</sub>) δ 190.3, 163.2, 162.3, 160.2, 159.8, 156.0, 138.9, 138.1, 138.0, 137.8, 129.4, 129.1, 129.0, 128.9, 128.8, 128.7, 128.5, 128.4, 121.1, 117.3, 113.0, 112.3, 94.2, 91.1, 74.9, 71.2, 71.0, 70.8, 67.8, 45.9, 32.8. IR (neat) 2955, 1660, 1602, 1153, 1113 cm<sup>-1</sup>. HRMS-EI ( $m/z$ ): M<sup>+</sup>Na calcd for C<sub>52</sub>H<sub>44</sub>O<sub>8</sub>, 819.2928; found, 819.2934. Anal. Calcd for C<sub>52</sub>H<sub>44</sub>O<sub>8</sub>: C, 78.37; H, 5.57. Found: C, 78.34; H, 5.64.**

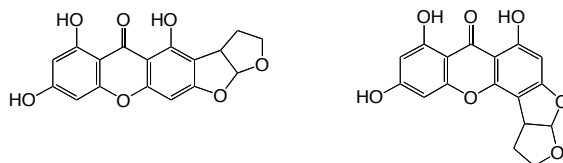

**(Linear) 4, 6, 8-Trihydroxy-2,3,3a,12a-tetrahydrofuro[2,3-b]furo-xanth-5-one (24) and (Angular) 4, 6, 8-Trihydroxy-1,2,3a,12c-tetrahydrofuro[2,3-c]furo-xanth-7-one (25).** (*Procedure E*) Tetrahydrobisfuran **19** (100 mg, 0.12 mmol), Pd black (100 mg, 0.94 mmol), and EtOAc (3 mL) were shaken 12 h under H<sub>2</sub> (30 psi). The product mixture was gravity filtered, washed with EtOAc and concentrated. This crude mixture was used a source of the angular xanthone **25** [TLC  $R_f$  = 0.04 ; 20% EtOAc in hexanes, <sup>1</sup>H NMR (400 MHz, CD<sub>3</sub>COCD<sub>3</sub>)  $\delta$  12.2 (s, 1H), 11.8 (s, 1H), 11.1 (s, 1H), 6.51 (d, 1H,  $J$  = 8.4 Hz), 6.46 (d, 1H,  $J$  = 2.1 Hz), 6.28 (d, 1H,  $J$  = 2.1 Hz), 6.21 (s, 1H), 4.1 (m, 2H), 3.5 (m, 1H), 2.1 (m, 2H)]. Pure **24** was isolated as a white solid (10.3 mg, 0.03 mmol, 24%, 250 °C dec; TLC  $R_f$  = 0.10; 20% EtOAc in hexanes) following elution of the crude product mixture through a plug of silica gel with 60% EtOAc in hexanes. <sup>1</sup>H NMR (400 MHz, CD<sub>3</sub>COCD<sub>3</sub>)  $\delta$  12.2 (s, 1H), 11.7 (s, 1H), 11.0 (s, 1H), 6.50 (d, 1H,  $J$  = 8.4 Hz), 6.44 (d, 1H,  $J$  = 2.1 Hz), 6.39 (s, 1H), 6.28 (d, 1H,  $J$  = 2.1 Hz), 4.1 (m, 2H), 3.5 (m, 1H), 2.1 (m, 2H). <sup>13</sup>C NMR (100 MHz, CD<sub>3</sub>SOCD<sub>3</sub>)  $\delta$  182.4, 166.3, 165.9, 162.0, 157.4, 157.2, 156.6, 113.5, 109.0, 101.8, 100.4, 98.6, 94.2, 89.0, 67.2, 42.7, 30.5. HRMS-EI ( $m/z$ ): M<sup>+</sup> Na calcd for C<sub>17</sub>H<sub>12</sub>O<sub>7</sub>, 351.0475; found, 351.0493.



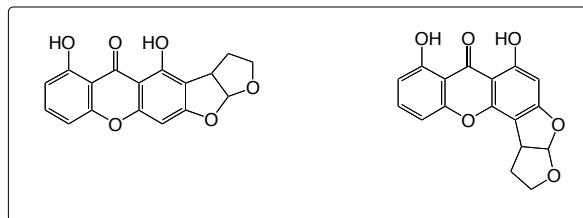

**Synthesis of (*Linear*) 4,6-Dihydroxy-2,3,3a,12a-tetrahydrofuro[2,3-b]furo-xanth-5-one (21) and (*Angular*) 6,8-Dihydroxy-1,2,3a,12c-tetrahydrofuro[2,3-c]furo-xanth-7-one (22).**

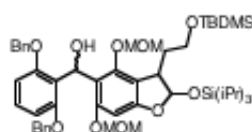

**5-[1-(*R,S*)-{2',6'-*Bis*-(*O*-benzyl)}-1-hydroxy-methyl]-3-(*t*-butyldimethyl-silyloxy-2-ethyl)-4,6-bis-(*O*-methoxymethyl)-2,3-dihydro-benzofuran-2-yloxy]-triisopropyl-silane (12).**

Benzophenols **12** (clear oil, 3.35 g, 3.77 mmol, 92%, TLC  $R_f$  0.53, 0.54 - 20% EtOAc in hexanes) were prepared from bromide **9** (2.64 g, 4.08 mmol) and 2,6-bis-(*O*-benzyl)-benzaldehyde (**10**, 1.3 g, 4.08 mmol) according to *Procedure A*.  $^1\text{H}$  NMR (400 MHz,  $\text{CD}_3\text{COCD}_3$ )  $\delta$  7.35 (m, 10H), 6.77, 6.75 (s, 2H), 6.67 (m, 1H), 6.40, 6.39 (s, 1H), 5.94, 5.92 (d,  $J = 2.0$  Hz, 1H), 5.52, 5.43 (d,  $J = 10.4$  Hz, 1H), 5.2 (m, 6H), 5.04 (m, 2H), 3.78 (m, 2H), 3.62, 3.60 (s, 1H), 3.5 (m, 1H), 2.99, 2.95, 2.85 (s, 6H), 1.87 (m, 1H), 1.79 (m, 1H) 1.2 (m, 21H), 0.85 (m, 9H), 0.05 (s, 6H).  $^{13}\text{C}$  NMR (100 MHz,  $\text{CD}_3\text{COCD}_3$ )  $\delta$  160.1, 159.9, 158.7, 158.6, 158.4, 158.2, 157.7, 154.7, 154.7, 139.0, 138.8, 138.8, 129.9, 129.8, 129.5, 129.3, 129.1, 128.9, 128.8, 128.7, 123.0, 121.9, 119.7, 115.5, 115.2, 107.5, 107.3, 107.1, 106.9, 100.4, 100.1, 95.4, 95.2, 94.8, 94.7, 71.6, 71.4, 68.6, 66.2, 62.3, 62.2, 58.0, 56.2, 49.8, 49.7, 38.6, 35.8, 26.9, 28.8, 18.9, 18.8, 15.0, 13.5, 13.4, -4.6. IR (neat) 3558, 2953, 1593, 1463, 1380, 1092  $\text{cm}^{-1}$ . HRMS-EI ( $m/z$ ):

$M^+Na$  calcd for  $C_{50}H_{72}O_{10}Si_2$ , 911.4556; found, 911.4543. Anal. Calcd for  $C_{50}H_{72}O_{10}Si_2$ : C, 67.53; H, 8.16. Found: C, 68.24; H, 8.04.

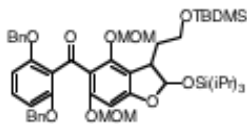

**5-Keto-[2',6'-bis-(*O*-benzyl)-phenyl]-3-(*t*-butyldimethyl-silyloxy-2-ethyl)-4,6-bis-(*O*-methoxymethyl)-2,3-dihydro-benzofuran-2-yloxy]-triisopropyl-silane (**14**). Benzophenone **14** (faintly yellow oil, 0.57 g, 0.65 mmol, 50%, TLC  $R_f$  0.53 - 20% EtOAc in hexanes) was prepared from benzophenols **12** (1.15 g, 1.3 mmol) according to *Procedure B*.  $^1H$  NMR (400 MHz,  $CD_3COCD_3$ )  $\delta$  7.25 (m, 11H), 6.73 (d, 2H,  $J$  = 8.5 Hz), 6.41 (s, 1H), 6.04 (d, 1H,  $J$  = 1.3 Hz), 5.05 (s, 4H), 4.8 (m, 4H), 3.73 (m, 2H), 3.53 (dd, 1H,  $J$  = 3.0, 9.6 Hz), 3.31 (s, 3H), 3.01 (s, 3H), 1.99 (m, 1H), 1.65 (s, 1H), 1.1 (m, 21H), 0.90, 0.88 (s, 9H), 0.03, 0.02 (s, 6H).  $^{13}C$  NMR (100 MHz,  $CD_3COCD_3$ )  $\delta$  191.4, 162.2, 159.1, 157.9, 155.0, 138.2, 131.1, 129.3, 129.2, 129.1, 128.3, 128.1, 124.3, 120.3, 115.8, 107.2, 106.7, 100.2, 95.3, 94.1, 71.0, 61.5, 57.2, 55.9, 48.7, 35.1, 26.4, 18.9, 18.4, 18.3, 12.9, -5.2. IR (neat) 2947, 2866, 1668, 1593, 1465, 1255, 1099  $cm^{-1}$ . HRMS-EI ( $m/z$ ):  $M^+Na$  calcd for  $C_{50}H_{70}O_{10}Si_2$ , 909.4399; found, 909.4360. Anal. Calcd for  $C_{50}H_{70}O_{10}Si_2$ : C, 67.68; H, 7.95. Found: C, 67.96; H, 7.98.**

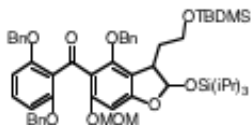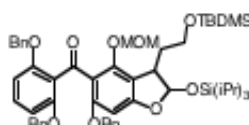

**5-Keto-[2',6'-bis-(*O*-benzyl)-phenyl]-3-(*t*-butyldimethyl-silyloxy-2-ethyl)-4-(*O*-benzyl)-6-(*O*-methoxymethyl)-2,3-dihydro-benzofuran-2-yloxy]-triisopropyl-silane and **5-****

**Keto-[2',6'-bis-(*O*-benzyl)-phenyl]-3-(*t*-butyldimethyl-silyloxy-2-ethyl)-6-(*O*-benzyl)-4-(*O*-methoxymethyl)-2,3-dihydro-benzofuran-2-yloxy]-triisopropyl-silane.** The isomeric tribenzylethers shown above (clear oil, 0.64 g, 0.69 mmol, 74%, TLC  $R_f$  0.21 - 20% EtOAc in hexanes) were prepared from benzophenone **14** (0.82 g, 0.92 mmol) according to *Procedure C*.  $^1\text{H}$  NMR (400 MHz,  $\text{CD}_3\text{COCD}_3$ )  $\delta$  7.3 (m, 16H), 6.68 (s, 1H), 6.44 (d,  $J = 8.4$  Hz, 2H), 6.06 (d,  $J = 1.4$  Hz, 1H), 4.97 (dd,  $J = 4.6, 16.6$  Hz, 4H), 4.82 (m, 4H), 3.66 (m, 2H), 3.51 (dd,  $J = 3.5, 9.6$  Hz, 1H), 3.08 (s, 3H), 1.98 (m, 1H), 1.63 (m, 1H), 1.2 (m, 21H), 0.85, 0.84 (s, 9H), 0.00, -0.02 (s, 6H).  $^{13}\text{C}$  NMR (100 MHz,  $\text{CD}_3\text{COCD}_3$ ) 191.2, 185.2, 162.4, 160.7, 159.0, 158.0, 156.4, 138.7, 138.2, 131.1, 129.2, 128.8, 128.4, 128.3, 128.2, 128.1, 124.2, 120.8, 115.0, 107.4, 106.8, 106.6, 95.3, 94.1, 74.9, 70.8, 61.3, 56.0, 48.7, 35.1, 26.4, 18.4, 18.3, 12.9, -5.2. IR (neat) 2947, 2866, 1667, 1593, 1469, 1377, 1256, 1100  $\text{cm}^{-1}$ . HRMS-EI ( $m/z$ ):  $\text{M}^+\text{Na}$  calcd for  $\text{C}_{55}\text{H}_{72}\text{O}_9\text{Si}_2$ , 955.4607; found, 955.4556. Anal. Calcd for  $\text{C}_{55}\text{H}_{72}\text{O}_9\text{Si}_2$ : C, 70.78; H, 7.78. Found: C, 70.96; H, 7.76.

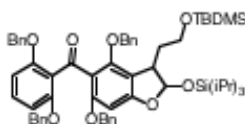

**5-Keto-[2',6'-bis-(*O*-benzyl)-phenyl]-3-(*t*-butyldimethyl-silyloxy-2-ethyl)-4,6-bis-(*O*-benzyl)-2,3-dihydro-benzofuran-2-yloxy]-triisopropyl-silane (**16**).** Tetrabenzylether **16** (clear oil, 0.68 g, 0.70 mmol, 78%, TLC  $R_f$  0.25 - 20% EtOAc in hexanes) was prepared from the mixture of tribenzylethers prepared above (0.84 g, 0.90 mmol) according to *Procedure C*.  $^1\text{H}$  NMR (400 MHz,  $\text{CD}_3\text{COCD}_3$ )  $\delta$  7.2 (m, 21H), 6.60 (d,  $J = 8.4$  Hz, 2H), 6.40 (s, 1H), 6.03 (s, 1H), 4.80 (s, 6H), 4.63 (m, 2H), 3.65 (m, 2H), 3.47 (dd,  $J = 8.6$  Hz, 1H), 1.95 (m, 1H), 1.61 (m, 1H), 1.15 (m, 21H), 0.81 (s, 9H), 0.00, -0.02 (s, 6H).  $^{13}\text{C}$  NMR (100 MHz,  $\text{CD}_3\text{COCD}_3$ )  $\delta$  191.2,

185.1, 162.5, 160.6, 158.1, 156.6, 138.8, 138.2, 137.7, 131.0, 129.1, 129.0, 128.8, 128.4, 128.2, 124.1, 120.3, 114.1, 107.4, 106.7, 92.2, 74.9, 72.7, 71.2, 70.7, 61.3, 48.7, 35.1, 26.4, 18.8, 18.4, 18.3, 12.9, -5.2. IR (neat) 2946, 2866, 1663, 1592, 1453, 1376, 1255, 1100  $\text{cm}^{-1}$ . HRMS-EI ( $m/z$ ):  $\text{M}^+ \text{Na}$  calcd for  $\text{C}_{60}\text{H}_{74}\text{O}_8\text{Si}_2$ , 1001.4814; found, 1001.4829. Anal. Calcd for  $\text{C}_{60}\text{H}_{74}\text{O}_8\text{Si}_2$ : C, 73.58; H, 7.62. Found: C, 73.67; H, 7.56.

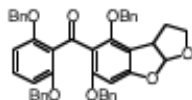

**5-Keto-[2',6'-bis-(O-benzyl)-phenyl]-4,6-bis-(O-benzyl)-[2,3-b]-benzo-2,3,3a,8a-tetrahydro-bisfuran (18).** Tetrahydrobisfuran **18** (white solid, mp = 58-60 °C, 0.30 g, 0.43 mmol, 86%, TLC  $R_f$  0.30 - 20% EtOAc in hexanes) was prepared from disilylether **16** (0.48 g, 0.50 mmol) according to *Procedure D*.  $^1\text{H}$  NMR (400 MHz,  $\text{CD}_3\text{COCD}_3$ )  $\delta$  7.2 (m, 20H), 7.06 (m, 1H), 6.65 (d,  $J$  = 8.4 Hz, 2H), 6.34 (d,  $J$  = 5.6 Hz, 1H), 6.32 (s, 1H), 4.74 (m, 8H), 3.94 (m, 2H), 3.42 (m, 1H), 1.99 (m, 2H).  $^{13}\text{C}$  NMR (100MHz,  $\text{CD}_3\text{COCD}_3$ )  $\delta$  191.1, 163.6, 160.6, 158.3, 156.4, 138.9, 138.1, 137.6, 131.3, 129.1, 129.0, 128.9, 128.5, 128.4, 128.4, 128.3, 123.9, 120.4, 113.0, 112.5, 106.8, 91.1, 74.9, 71.2, 70.9, 67.8, 45.8, 32.5. IR (neat) 2975, 2873, 1662, 1592, 1452, 1376, 1249, 1097  $\text{cm}^{-1}$ . HRMS-EI ( $m/z$ ):  $\text{M}^+ \text{Na}$  calcd for  $\text{C}_{45}\text{H}_{38}\text{O}_7$ , 713.2510; found, 713.2543. Anal. Calcd for  $\text{C}_{45}\text{H}_{38}\text{O}_7$ : C, 78.24; H, 5.54. Found: C, 78.19, H, 5.56.

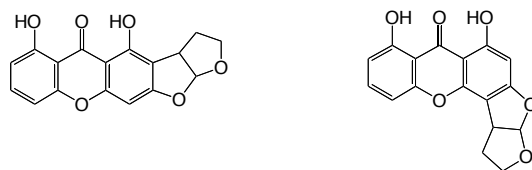

**(Linear) 4,6-Dihydroxy-2,3,3a,12a-tetrahydrofuro[2,3-b]furo-xanth-5-one (21) and (Angular) 6,8-Dihydroxy-1,2,3a,12c-tetrahydrofuro[2,3-c]furo-xanth-7-one (22).**

Tetrahydrobisfuran (**18**, 100 mg 0.14 mmol), Pd black (100 mg, 0.94 mmol), and EtOAc (4 mL) were shaken 12 h under H<sub>2</sub> (30 psi). The product mixture was gravity filtered, washed with EtOAc and concentrated. This crude mixture was used as a source of the angular xanthone **22** [TLC *R<sub>f</sub>* 0.33; 20% EtOAc in hexanes, <sup>1</sup>H NMR (400 MHz, CDCl<sub>3</sub>) δ 12.16 (s, 1H), 11.89 (s, 1H), 7.72 (t, *J* = 8.4 Hz, 1H), 7.05 (d, *J* = 8.4 Hz, 1H), 6.81 (d, *J* = 8.4 Hz, 1H), 6.54 (d, *J* = 5.6 Hz, 1H), 6.26 (s, 1H), 4.15 (m, 2H), 3.63 (m, 1H), 2.15 (m, 2H)]. Pure **21** was isolated as a white solid (9 mg, 0.03 mmol, 20% yield, 245 °C dec, TLC *R<sub>f</sub>* 0.43; 20% EtOAc in hexanes) following elution of the crude product mixture through a plug of silica gel with 60% EtOAc in hexanes. <sup>1</sup>H NMR (400 MHz, CDCl<sub>3</sub>) δ 12.07 (s, 1H), 11.75 (s, 1H), 7.70 (t, *J* = 8.4 Hz, 1H), 7.00 (d, *J* = 8.4 Hz, 1H), 6.80 (d, *J* = 8.4 Hz, 1H), 6.57 (s, 1H), 6.53 (d, *J* = 5.6 Hz, 1H), 4.10 (m, 2H), 3.51 (m, 1H), 2.14 (m, 2H). <sup>13</sup>C NMR (100 MHz, CD<sub>3</sub>SOCD<sub>3</sub>) δ 184.0, 167.0, 160.2, 157.7, 156.7, 155.6, 137.4, 113.7, 110.7, 109.3, 107.1, 106.9, 102.5, 89.2, 67.3, 42.7, 30.5. HRMS-EI (*m/z*): M<sup>+</sup>H calcd for C<sub>17</sub>H<sub>12</sub>O<sub>6</sub>, 313.0707; found, 313.0737.

**Preparation of bis-*O*-methylxanthone derivatives (Figure 2).**

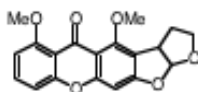

**4,6-Dimethoxy-2,3,3a,12a-tetrahydrofuro[2,3-b]furo-xanth-5-one.**

Dihydroxyxanthone **21** (approximately 0.5 mg), dimethylsulfate (0.25 mL), and DMF (3 mL) were stirred at 0 °C and then NaH (0.5 g) was added. The ice bath was removed and stirring was continued 90 min. The mixture was then diluted with EtOAc and quenched with aq NaHCO<sub>3</sub>. The organic layer was washed with water and brine, then dried over Na<sub>2</sub>SO<sub>4</sub>, and concentrated. White needles (approximately 0.3 mg) were recrystallized from EtOAc and hexanes. TLC *R<sub>f</sub>* 0.31 – 50% EtOAc in hexanes (the dimethylether emits blue fluorescence under short wave UV light). <sup>1</sup>H NMR (400 MHz, CD<sub>3</sub>COCD<sub>3</sub>) δ 7.62 (t, *J* = 8.4 Hz, 1H), 6.99 (d, *J* = 8.4 Hz, 1H), 6.93 (d, *J* = 8.4 Hz, 1H), 6.54 (s, 1H), 6.44 (d, *J* = 5.6 Hz, 1H), 4.06 (m, 2H), 3.60 (m, 1H), 2.28 (m, 2H).

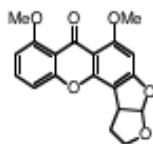

**6,8-Dimethoxy-1,2,3a,12c-tetrahydrofuro[2,3-c]furo-xanth-7-one.**

Sterigmatocystin (**30**) (approximately 2.0 mg), 10% Pd on carbon (20 mg) and EtOAc (2 mL) were shaken 5 h under H<sub>2</sub> (30 psi). The mixture was gravity filtered, and washed with EtOAc. The resulting filtrate was concentrated and eluted through a silica plug with 30% EtOAc and hexanes. The sterigmatocystin TLC *R<sub>f</sub>* was 0.32 and the reduced tetrahydrosterigmatocystin TLC *R<sub>f</sub>* was 0.24 (30% EtOAc in hexanes). The resulting tetrahydrobisfuran was then combined with dimethylsulfate (0.25 mL) and DMF (3 mL). The mixture was stirred at 0 °C and NaH (0.5 g) was added. The ice bath was then removed and stirring was continued 90 min. The mixture was diluted with EtOAc and quenched with aq NaHCO<sub>3</sub>. The organic layer was washed with

water and brine, dried over  $\text{Na}_2\text{SO}_4$  and concentrated. *O*-Methyldihydrohydrosterigmatocystin was eluted through a plug of silica gel with 50% EtOAc and hexanes. (TLC  $R_f$  0.24; 50% EtOAc in hexanes; the dimethylether emits blue fluorescence under short wave UV light).  $^1\text{H}$  NMR (400 MHz,  $\text{CD}_3\text{COCD}_3$ )  $\delta$  7.59 (t,  $J = 8.4$  Hz, 1H), 7.02 (d,  $J = 8.4$  Hz, 1H), 6.92 (d,  $J = 8.4$  Hz, 1H), 6.47 (d,  $J = 5.6$  Hz, 1H), 6.41 (s, 1H), 4.1 (m, 2H), 3.6 (m, 1H), 2.3 (m, 2H).

### **Microbiological Procedures**

Organisms, media, and buffers were detailed in the accompanying report. Likewise, the whole-cell and ground-cell feeding experiments were conducted as described in that paper.
